# Supplementary material
Source: PubMed Central journal article supplement (PMC3146251)
Supplement: supp_me.2011-0093_4870_supplemental_section_ME_11_0093_revised.pdf [file supp_me.2011-0093_4870_supplemental_section_ME_11_0093_revised.pdf]

## Supplemental Figure S1

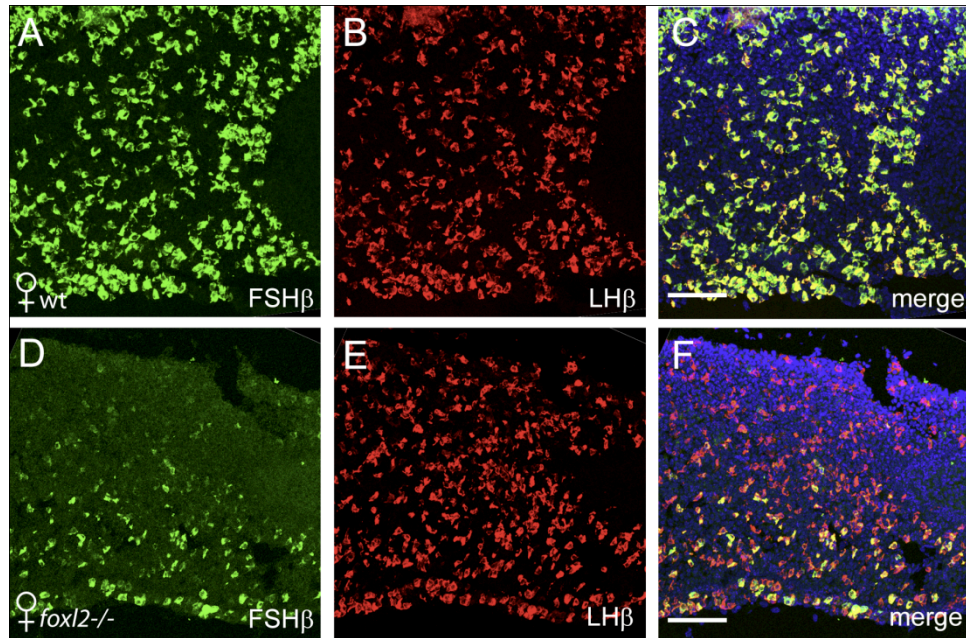

**Supplemental Fig. S1.** Expression of FSH $\beta$  in the *Foxl2* mutant female pituitary.

Confocal micrographs of pituitary sections from 3-week old female wildtype (A, B, C) or *FoxL2* mutant (D, E, F) animals stained for FSH $\beta$  (A, D), LH $\beta$  (B, E) or the merged images (C, F). In the wildtype, FSH $\beta$  positive cells (A) are found throughout the anterior lobe. In the *FoxL2* mutant animals, the number of FSH $\beta$  positive cells (D) is dramatically reduced. In contrast to the *FoxL2* mutant male pituitary where the remaining FSH $\beta$  positive cells are clustered in the ventral medial quadrant, the remaining FSH $\beta$  cells in the *FoxL2* mutant female are found spread out over the ventral half of the anterior lobe. Staining for LH $\beta$  (B, E) reveals gonadotropes throughout the anterior lobe of both the wildtype (B) and *FoxL2* mutant (E), indicating that gonadotropes are appropriately specified in the *FoxL2* mutant. (C, F) The merged images show that whereas the coincidence of FSH $\beta$  and LH $\beta$  is complete in the wildtype, in the *FoxL2* mutant, most gonadotropes fail to express FSH $\beta$ . Scale bar = 100 $\mu$ m.

**Supplemental Table S1.** Summary of cell count data for pituitaries of wildtype (wt) or *Foxl2* mutant (*Foxl2*<sup>-/-</sup>) male mice.

| 1                        | 2         | 3                                  | 4                              | 5           | 6                                                       | 7                                    | 8       |
|--------------------------|-----------|------------------------------------|--------------------------------|-------------|---------------------------------------------------------|--------------------------------------|---------|
| <b>Pituitary Hormone</b> | wt number | <i>Foxl2</i> <sup>-/-</sup> number | wt cell number/mm <sup>2</sup> | wt St. Err. | <i>Foxl2</i> <sup>-/-</sup> cell number/mm <sup>2</sup> | <i>Foxl2</i> <sup>-/-</sup> St. Err. | p value |
| <b>αGSU</b>              | 2 (2,0)   | 3 (3,0)                            | 6500                           | 2488        | 7716                                                    | 2081                                 | n.s.    |
| <b>FSHβ</b>              | 4 (3,1)   | 5 (4,1)                            | 3383                           | 492         | 1083                                                    | 221                                  | 0.003   |
| <b>LHβ</b>               | 4 (2,2)   | 3 (2,1)                            | 4676                           | 1136        | 5938                                                    | 1554                                 | n.s.    |
| <b>TSHβ</b>              | 3 (2,1)   | 2 (1,1)                            | 3346                           | 926         | 3130                                                    | 1860                                 | n.s.    |
| <b>PRL</b>               | 2 (2,0)   | 2 (2,0)                            | 4246                           | 452         | 4759                                                    | 289                                  | n.s.    |
| <b>GH</b>                | 2 (2,0)   | 2 (2,0)                            | 5547                           | 451         | 7851                                                    | 522                                  | 0.05    |
| <b>ACTH</b>              | 4 (4,0)   | 3 (3,0)                            | 2796                           | 501         | 4733                                                    | 196                                  | 0.01    |

Column 1 lists the pituitary hormones evaluated by immunohistochemistry. Columns 2 and 3 list the total number of wildtype or *Foxl2* mutant animals used for cell counting; the number in parentheses indicate numbers of 3-week or 5-week old animals (3-week, 5-week). Columns 4 and 5 show the calculated numbers and the standard errors, respectively, of cells per square millimeter of pituitary sections (20 microns) of the wildtype animals. Columns 6 and 7 show the calculated numbers and the standard errors, respectively, of cells per square millimeter of the sections from *Foxl2* mutant animals. Column 8 shows the calculated p value to determine statistical significance (n.s.=not significant, p>0.05).

**Supplemental Table S2.** List of primers for qRT-PCR analyses.

|               | <b>Forward Primers</b>      | <b>Reverse Primers</b>       |
|---------------|-----------------------------|------------------------------|
| <i>Fshb</i>   | 5'-gtgcgggctactgctacact     | 5'-caggcaatcttacggctctcg     |
| <i>Lhb</i>    | 5'-ctcagccagtggtgcacctac    | 5'-ggaaaggagactatgggggtctac  |
| <i>Cga</i>    | 5'-tcctcaaaaagtccagagc      | 5'-gaagagaatgaagaatatgcaggaa |
| <i>Tshb</i>   | 5'-aagagctgggggtgttcaaa     | 5'-acaagcaagagcaaaaagcac     |
| <i>Gh</i>     | 5'-gcttgccaatggctacaga      | 5'-ggaaaagcactagcctcctg      |
| <i>Prl</i>    | 5'-tgttcccagcagtcacat       | 5'-cagcaacaggaggagtgtcc      |
| <i>Pomc</i>   | 5'-cagtgccaggacctcacc       | 5'-cagcgagaggtcgagttag       |
| <i>Gnrhr</i>  | 5'-agcaacagcaagctgaaca      | 5'-ccagagccgtctgctaggta      |
| <i>Fst</i>    | 5'-cctatgagggaaagtgtatcacia | 5'-tggaatccataggcatttt       |
| <i>Acvr1b</i> | 5'-agagggtggggaccacaac      | 5'-tgcttcattgtgattgtctcg     |
| <i>Acvr2a</i> | 5'-ccctctgtactgttctactca    | 5'-gcaatggcttcaaccctagt      |
| <i>Acvr2b</i> | 5'-tggtgttcggttgagc         | 5'-ggccatgtaccgtctggt        |
| <i>Smad2</i>  | 5'-aggacggttagatgagcttgag   | 5'-gtccccaatttcagagcaa       |
| <i>Smad3</i>  | 5'-tcaagaagacggggcagtt      | 5'-agccgaccatccagtgac        |
| <i>Gapdh</i>  | 5'-atggtgaaggtcggtgtga      | 5'-aatctccacttgccactgc       |
